# Supplementary material for: Novel arsine ligands for selective hydroformylation of alk-1-enes employing platinum/tin catalysts
Source: Royal Society of Chemistry journal article supplement (doi:10.1039/a906903h), 2000-01-01
Supplement: a906903h.doc [file a906903h.doc]

**Supporting information**

**Computational Details.** The molecular mechanics calculations were performed using the CAChe WorkSystem version 4.0,1 on a Apple Power MacIntosh 950, equipped with two CAChe CXP coprocessors. Calculations were carried out similarly to the method described by Casey and Whiteker,2 using a Rh-P bond length of 2.315 Å, and a Rh-As bond length of 2.415 Å.3 Minimization’s were done via the block-diagonal Newton-Raphson method, allowing the structures to converge fully with a termination criterion of a rms factor of 0.0001 kcal mol-1 Å-1 or less.

**General Procedure.** All reactions were carried out using standard Schlenk techniques under an atmosphere of purified argon. Toluene and *o*-dichlorobenzene were distilled from sodium, THF from sodium/benzophenone, and hexanes from sodium/benzophenone/triglym. Methanol, ethanol, and dichloromethane were distilled from CaH2. Chemicals were purchased from Acros Chimica and Aldrich Chemical Co. Chlorodiphenylarsine was prepared according to a literature procedure.4 Melting points were determined on a Gallenkamp MFB-595 melting point apparatus in open capillaries and are uncorrected. NMR spectra were obtained on a Bruker AMX 300 spectrometer. 31P and 13C spectra were measured 1H decoupled. TMS was used as a standard for 1H and 13C NMR and H3PO4 for 31P NMR. Elemental analyses were carried out on an Elementar Vario EL apparatus. Infrared spectra were recorded on a Nicolet 510 FT-IR spectrophotometer. HP-IR spectra were measured using a 20-mL homemade stainless steel autoclave equipped with mechanical stirring and ZnS windows. Hydroformylation reactions were carried out in a 200-mL homemade stainless steel autoclave. Syn gas (CO/H2, 1:1, 99.9%) and CO (99.9%) were purchased from Air Liquide. Gas chromatographic analyses were run on an Interscience HR GC Mega 2 apparatus (split/splitless injector, J&W Scientific, DB1 30m column, film thickness 3.0 mm, carrier gas 70 kPa He, FID detector) equipped with a Hewlett-Packard Data system (Chrom-Card).

**2,7-Di-*tert*-butyl-9,9-dimethyl-4,5-bis(diphenylarsino)xanthene (2).** At -60 °C 2.8 mL of *n*-butyllithium (2.5 M in hexanes, 6.9 mmol) was added dropwise to a stirred solution of 1.50 g of 4,5-dibromo-2,7-di-*t*-butyl-9,9-dimethylxanthene (3.12 mmol) in 50 mL of THF. The resulting beige suspension was stirred for 1 h. Next a solution of 1.82 g of chlorodiphenylarsine (6.9 mmol) in 20 mL of THF was added and the reaction mixture was slowly warmed to room temperature overnight. The reaction mixture was diluted with 25 mL of ethyl acetate and hydrolyzed with 25 mL of a one to one mixture of brine and dilute hydrochloric acid. The water layer was removed and the organic layer was dried over MgSO4. The solvents were removed in vacuo and the residual off-white powder was washed with hexanes and crystallized from ethanol/THF. Yield: 2.01 g of white crystals (83%). Mp 207-208 °C. 1H NMR (CDCl3):  = 7.41 (d, 4*J*(H,H) = 2.3 Hz, 2H; H1,8), 7.27 (m, 20H; CH), 6.69 (d, 4*J*(H,H) = 2.3 Hz, 2H; C3,6), 1.72 (s, 6H; CH3), 1.15 (s, 18H; *t*-butyl). 13C{1H} NMR (C6D6):  = 150.1 (CO), 145.4 (C2,7), 139.9 (Cas), 133.8 (CH), 129.5 (C1,8), 128.6 (C4,5), 128.1 (CH), 127.8 (CH), 126.8 (CC9), 122.8 (C3,6), 34.8 (C9), 34.4 (C(CH3)3), 32.3 (C9CH3), 31.2 (C(CH3)3). IR (KBr, cm-1): 2961 (s), 2867 (m), 1481 (m), 1434 (s), 1277 (m), 1263 (s), 1245 (m), 739 (m), 732 (m), 696 (s). Anal. Calcd. for C47H48As2O: C, 72.49; H, 6.22. Found: C, 72.65; H, 6.25.

**4-Bromo-2,7-di-*tert*-butyl-9,9-dimethyl-5-diphenylphosphinoxanthene (5).** At -15 °C 3.8 mL of *n*-butyllithium (2.5 M in hexanes, 9.5 mmol) was added dropwise to a stirred solution of 4.50 g of 4,5-dibromo-2,7-di-*t*-butyl-9,9-dimethylxanthene (9.38 mmol) in 100 mL of THF. The resulting yellow solution was stirred for 1 h. Next a solution of 1.9 mL of chlorodiphenylphosphine (10 mmol) in 10 mL of hexanes was added and the reaction mixture was warmed to room temperature. After 1 h the reaction mixture was diluted with 50 mL of diethyl ether and hydrolyzed with 50 mL of a one to one mixture of brine and dilute hydrochloric acid. The water layer was removed and the organic layer was dried over MgSO4. The solvents were removed in vacuo and the residual off-white powder was washed with hexanes and crystallized from dichloromethane/ethanol. Yield: 2.48 g of white crystals (45%). Mp 177-179 °C. 1H NMR (CDCl3):  = 7.35 (m, 13H; CH), 6.55 (dd, 4*J*(H,H) = 2.4 Hz, 3*J*(P,H) = 4.4 Hz, 1H; H6), 1.64 (s, 6H; CH3), 1.29 (s, 9H; *t*-butyl), 1.13 (s, 9H; *t*-butyl). 31P{1H} NMR (CDCl3):  = -13.2. 13C{1H} NMR (CDCl3):  = 149.7 (d, 2*J*(P,C) = 15.6 Hz; CO), 146.7, 145.9, 145.2, 136.8 (d, 1*J*(P,C) = 10.6 Hz; PC), 134.5 (CH), 134.2 (CH), 131.1, 129.1 (CH), 128.6 (d, 2*J*(P,C) = 29.4 Hz; PCCH), 128.5 (CH), 124.8 (d, 1*J*(P,C) = 15.1 Hz; PC), 123.2 (CH), 121.6 (CH), 35.4 (C9), 34.7 (C(CH3)3), 34.7 (C(CH3)3), 32.4 (C9CH3), 31.5 (C(CH3)3), 31.4 (C(CH3)3). IR (KBr, cm-1): 2963 (s), 2869 (m), 1478 (m), 1434 (s), 1363 (m), 1305 (m), 1271 (s), 1187 (m), 1109 (m), 867 (m), 742 (s), 695 (s), 496 (m). Anal. Calcd. for C35H38BrOP: C, 71.79; H, 6.55. Found: C, 71.58; H, 6.59.

**2,7-Di-*tert*-butyl-9,9-dimethyl-4-diphenylarsino-5-diphenylphosphinoxanthene (3).** At -60 °C 1.1 mL of *n*-butyllithium (2.5 M in hexanes, 2.8 mmol) was added dropwise to a stirred solution of 1.50 g of **5** (2.56 mmol) in 25 mL of THF. The resulting beige suspension was stirred for 1 h. Next a solution of 0.75 g of cholorodiphenylarsine (2.8 mmol) in 7.5 mL of hexanes was added and the reaction mixture was slowly warmed to room temperature overnight. The reaction mixture was diluted with 25 mL of ethyl acetate and hydrolyzed with 25 mL of a one to one mixture of brine and dilute hydrochloric acid. The water layer was removed and the organic layer was dried over MgSO4. The solvents were removed in vacuo and the residual off-white powder was washed with hexanes and crystallized from ethanol/THF. Yield: 0.93 g of white crystals (49%). Mp 201-203 °C. 1H NMR (CDCl3):  = 7.41 (d, 4*J*(H,H) = 2.3 Hz, 1H; CH), 7.37 (d, 4*J*(H,H) = 2.4 Hz, 1H; CH), 7.23 (m, 20H; CH), 6.67 (d, 4*J*(H,H) = 2.3 Hz, 1H; CH), 6.52 (dd, 3*J*(P,H) = 4.5 Hz, 4*J*(H,H) = 2.3 Hz, 1H; H6), 1.69 (s, 6H; CH3), 1.15 (s, 18H; *t*-Bu). 31P{1H} NMR (CDCl3):  = -15.6. 13C{1H} NMR (CDCl3):  = 149.7 (d, 2*J*(P,C) = 15.9 Hz; CO), 146.7, 145.9, 145.2, 136.7 (d, 1*J*(P,C) = 10.6 Hz; PC), 134.5 (CH), 134.2 (CH), 131.1, 129.1 (CH), 128.8 (d, 2*J*(P,C) = 29.3 Hz; PCCH), 128.6, 128.6 (CH), 124.7 (d, 1*J*(P,C) = 13.7 Hz; PC), 123.2 (CH), 121.6 (CH), 35.4 (C9), 34.7 (C(CH3)3), 34.7 (C(CH3)3), 32.4 (C9CH3), 31.4 (C(CH3)3), 31.4 (C(CH3)3). IR (KBr, cm-1): 2961 (s), 1477 (m), 1423 (s), 1264 (s), 1247 (s), 1186 (m), 740 (s), 695 (s), 499 (m). Anal. Calcd. for C47H48AsOP: C, 76.83; H, 6.58. Found: C, 76.56; H, 6.41.

1) CAChe Scientific Inc., 18700 N.W. Walker Road, Building 92-01, Beaverton, OR 97006.

2) Casey, C. P.; Whiteker, G. T. *Isr. J. Chem.* **1990**, *30*, 299-304.

3) According to the Cambridge Crystallographic Database, a distance of 2.415 Å is typical for Rh-As bond lengths.

4) Bliznyuk, N. K.; Levskaya, G. S.; Matyukhina, E. N. *J. Gen. Chem. USSR* **1965**, *35*, 1253-1255.
